# Supplementary material for: Crystal structures of discrete, one-dimensional and cocrystalline copper(ii)–uranyl(vi) systems: the influence of the reactant ratio in the competition between hydrogen bonds and coordinate bonds
Source: Royal Society of Chemistry journal article supplement (doi:10.1039/c3ce41625a), 2013-01-01
Supplement: c3ce41625a.pdf [file c3ce41625a.pdf]

## **Electronic Supplementary Information**

**For**

**Crystal structures of discrete, one-dimensional and cocrystalline copper(II)–  
uranyl(VI) systems: Influence of the reactant ratio in the competition between  
hydrogen bonds and coordinate bonds**

**Sagarika Bhattacharya, Arpita Jana and Sasankasekhar Mohanta\***

## Electronic spectra

The electronic absorption spectra of compounds **1–4** and the corresponding mononuclear copper(II) compounds have been recorded. The compounds **1**, **3** and **4** are insoluble in common organic solvents except N,N-dimethylformamide (dmf) and unstable in the solution of dmf, as evidenced by the deposition of corresponding mononuclear compound from dmf solution. On the other hand, compound **2** is stable in acetonitrile solution. Therefore, while only diffuse reflectance spectra were recorded for **1**, **3** and **4**, both the solid state and solution (in acetonitrile) spectra were recorded for **2**. Spectral data along with some structural parameters are listed in Table S1. The spectra of **4** and the corresponding copper(II) compounds are shown in Fig. S1, while the spectra of other cases are shown in Figs. S2–S4.

It has been already mentioned that a correlation was proposed regarding the d-d band position of copper(II) as the function of shifting of the metal ion from the basal plane.<sup>1</sup> According to this correlation, the more the shifting of copper(II) from the basal plane, the less the energy of d-d transition. Although it was proposed long before, it was kept in darkness. Recently, we have reopened the issue and checked how it could be useful.<sup>2–5</sup> What we have already observed includes: (i) the correlation does not work for the copper(II) compounds derived from different ligands; (ii) the difference of  $\lambda_{\max}$  values of a copper(II)–diamagnetic compound and the corresponding mononuclear copper(II) compound matches well with the relative shifting of copper(II) in the two compounds in some cases, although inconsistency is observed in some other cases. In particular, in the  $\text{Cu}^{\text{II}}\text{U}^{\text{VI}}$  compounds, we have observed good correlation.<sup>3,4</sup> It is relevant therefore to check how much the correlation is valid in the present series of compounds.

As listed in Table S1, the d-d band of  $\{[\text{Cu}^{\text{II}}\text{L}^{\text{OMe-en}}(\text{U}^{\text{VI}}\text{O}_2)(\text{NO}_3)]_2[(\text{U}^{\text{VI}}\text{O}_2)_2(\mu\text{-HO})_2(\text{NO}_3)_4]\}_n$  (**4**) and the corresponding mononuclear compound  $[\text{Cu}^{\text{II}}\text{L}^{\text{OMe-en}}(\text{H}_2\text{O})]$  appears at 492 and 630 nm, respectively, *i.e.*, the band in **4** is blue shifted by a large 138 nm in comparison to the corresponding mononuclear copper(II) compound. The observation is well in line with the correlation because the copper(II) centre in **4** ( $d_{\text{Cu}} = 0.03 \text{ \AA}$ ) is much well pocketed in the basal plane in comparison to that in  $[\text{Cu}^{\text{II}}\text{L}^{\text{OMe-en}}(\text{H}_2\text{O})]$  ( $d_{\text{Cu}} = 0.204 \text{ \AA}$ ).<sup>3</sup> As already mentioned, another copper(II)–uranyl(VI) compound  $\{[\text{Cu}^{\text{II}}\text{L}^{\text{OMe-en}}]_2 \cdot \{(\text{U}^{\text{VI}}\text{O}_2)(\text{NO}_3)_2(\text{H}_2\text{O})_2\}\}$  (**2A**) has been reported previously.<sup>14</sup> Both the  $\lambda_{\max}$  (575 nm; Fig. S1) and  $d_{\text{Cu}}$  (0.087 Å) in **2A** are

intermediate in comparison to those in  $[\text{Cu}^{\text{II}}\text{L}^{\text{OMe-en}}(\text{H}_2\text{O})]$  and **4**. So, the correlation works nicely in these three compounds derived from the same ligand; order of  $\lambda_{\text{max}}$  is  $[\text{Cu}^{\text{II}}\text{L}^{\text{OMe-en}}(\text{H}_2\text{O})]$  (630 nm) > **2A** (575 nm) > **4** (492 nm) and the order of  $d_{\text{Cu}}$  is  $[\text{Cu}^{\text{II}}\text{L}^{\text{OMe-en}}(\text{H}_2\text{O})]$  (0.204 Å) > **2A** (0.087 Å) > **4** (0.03 Å).

The  $d_{\text{Cu}}$  values of  $[\{\text{Cu}^{\text{II}}\text{L}^{\text{OEt-en}}\}_2\cdot\{\text{U}^{\text{VI}}\text{O}_2(\text{NO}_3)_2(\text{H}_2\text{O})_2\}]$  (**1**;  $d_{\text{Cu}} = 0.029$  Å) and  $[\text{Cu}^{\text{II}}\text{L}^{\text{OEt-en}}\text{C}(\text{H}_2\text{O})]_6$  ( $d_{\text{Cu}} = 0.00$  Å) are not appreciably different, as are their  $\lambda_{\text{max}}$  values (567 and 565 nm for **1** and the mononuclear, respectively). The  $\lambda_{\text{max}}$  values of  $[(\text{U}^{\text{VI}}\text{O}_2)_2(\mu\text{-H}_2\text{O})_2(\text{NO}_3)_4]\cdot 4[\text{Cu}^{\text{II}}\text{L}^{\text{OEt-py}}(\text{H}_2\text{O})]\cdot 2\text{MeCN}$  (**3**) and  $[\text{Cu}^{\text{II}}\text{L}^{\text{OEt-py}}(\text{H}_2\text{O})]$  are 474 and 480 nm, respectively. Both the two types of copper(II) centres in **3** are well inside the  $\text{O}_4$  compartment, as evidenced by the small (0.034/0.038 Å)  $d_{\text{Cu}}$  values. On the other hand, it has not been possible to get a diffraction quality single crystal of  $[\text{Cu}^{\text{II}}\text{L}^{\text{OEt-py}}(\text{H}_2\text{O})]$  and so the comparison of d-d band of **3** with the corresponding mononuclear compound is not possible. Regarding  $[\text{Cu}^{\text{II}}(\text{MeCN})\text{L}^{\text{OEt-pn}}(\text{U}^{\text{VI}}\text{O}_2)(\text{NO}_3)_2]$  (**2**) and the corresponding mononuclear compound  $[\text{Cu}^{\text{II}}\text{L}^{\text{OEt-pn}}\text{C}(\text{H}_2\text{O})]$  (crystallographic information, selected bond lengths/angles and geometries of the hydrogen bonds of this compound are listed in Tables S2–S4, respectively, while crystal structure of this compound is shown in Fig. S5),<sup>7</sup> the  $d_{\text{Cu}}$  values in the former (0.176 Å) is much greater than in the latter (0.031 Å), revealing that  $\lambda_{\text{max}}$  of **2** should be significantly greater than that in  $[\text{Cu}^{\text{II}}\text{L}^{\text{OEt-pn}}\text{C}(\text{H}_2\text{O})]$ . However, in contrast to the expectation,  $\lambda_{\text{max}}$  values in diffuse reflectance spectra are practically identical, 674 nm for **2** and 675 nm for  $[\text{Cu}^{\text{II}}\text{L}^{\text{OEt-pn}}\text{C}(\text{H}_2\text{O})]$ . Even in solution spectra, significant difference of  $\lambda_{\text{max}}$  values does not occur;  $\lambda_{\text{max}}$  of **2** (625 nm) is greater by only 10 nm than that of  $[\text{Cu}^{\text{II}}\text{L}^{\text{OEt-pn}}\text{C}(\text{H}_2\text{O})]$  (615 nm).

**Table S1** The comparison of the d-d band position and the displacement of the copper(II) centres from their least-squares N(imine)<sub>2</sub>O(phenoxo)<sub>2</sub> basal plane in **1–4** and the corresponding mononuclear systems

| Compounds                                                                                                                                                                                           | $\lambda_{\max}$<br>/nm | $\Delta\lambda_{\max}^a$<br>/nm | $d_{\text{Cu}}/\text{\AA}$ |
|-----------------------------------------------------------------------------------------------------------------------------------------------------------------------------------------------------|-------------------------|---------------------------------|----------------------------|
| $[\text{Cu}^{\text{II}}\text{L}^{\text{OEt-en}}\text{C}(\text{H}_2\text{O})]^b$                                                                                                                     | 565                     | ----                            | 0.00                       |
| $[\{\text{Cu}^{\text{II}}\text{L}^{\text{OEt-en}}\}_2 \cdot \{(\text{U}^{\text{VI}}\text{O}_2)(\text{NO}_3)_2(\text{H}_2\text{O})_2\}]$<br>( <b>1</b> )                                             | 567                     | 2                               | 0.029                      |
| $[\text{Cu}^{\text{II}}\text{L}^{\text{OEt-pn}}\text{C}(\text{H}_2\text{O})]^c$                                                                                                                     | 615                     | ----                            | 0.031                      |
| $[\text{Cu}^{\text{II}}(\text{MeCN})\text{L}^{\text{OEt-pn}}(\text{U}^{\text{VI}}\text{O}_2)(\text{NO}_3)_2]$ ( <b>2</b> )                                                                          | 625                     | 10                              | 0.176                      |
| $[\text{Cu}^{\text{II}}\text{L}^{\text{OEt-py}}(\text{H}_2\text{O})]$                                                                                                                               | 480                     | ----                            | ----                       |
| $[(\text{U}^{\text{VI}}\text{O}_2)_2(\mu\text{-H}_2\text{O})_2(\text{NO}_3)_4] \cdot$<br>$4[\text{Cu}^{\text{II}}\text{L}^{\text{OEt-py}}(\text{H}_2\text{O})] \cdot 2\text{MeCN}$ ( <b>3</b> )     | 474                     | 6                               | 0.038 (Cu1)<br>0.034 (Cu2) |
| $[\text{Cu}^{\text{II}}\text{L}^{\text{OMe-en}}(\text{H}_2\text{O})]$                                                                                                                               | 630                     | ----                            | 0.204                      |
| $\{[\text{Cu}^{\text{II}}\text{L}^{\text{OMe-en}}(\text{U}^{\text{VI}}\text{O}_2)(\text{NO}_3)]_2$<br>$\cdot [(\text{U}^{\text{VI}}\text{O}_2)_2(\mu\text{-HO})_2(\text{NO}_3)_4]\}_n$ ( <b>4</b> ) | 492                     | 138                             | 0.030                      |
| $[\{\text{Cu}^{\text{II}}\text{L}^{\text{OMe-en}}\}_2 \cdot \{(\text{U}^{\text{VI}}\text{O}_2)(\text{NO}_3)_2(\text{H}_2\text{O})_2\}]^d$<br>( <b>2A</b> )                                          | 575                     | 55                              | 0.087                      |

<sup>a</sup>Shifting amount of the copper(II) d-d band in **1–4** in comparison to that in  $[\text{Cu}^{\text{II}}\text{L}^{\text{OEt-en/OEt-pn/OEt-py/OMe-en}}(\text{H}_2\text{O})]$ . <sup>b</sup>Ref 6. <sup>c</sup>Ref 7. <sup>d</sup>Ref 3.

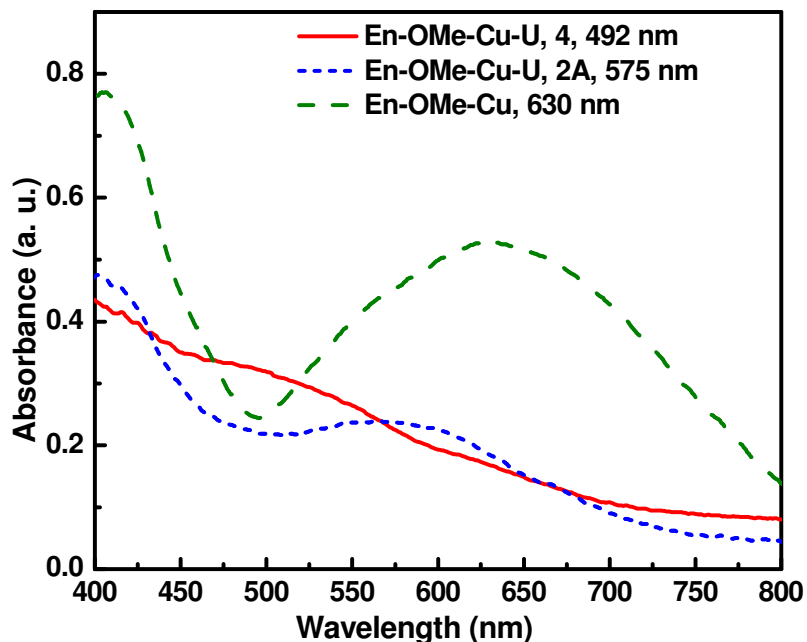

**Fig. S1** Diffuse reflectance spectra, in the range of 400–800 nm, of compound **4**, **2A** and the corresponding mononuclear copper(II) compound,  $[\text{Cu}^{\text{II}}\text{L}^{\text{OMe-en}}(\text{H}_2\text{O})]$ .

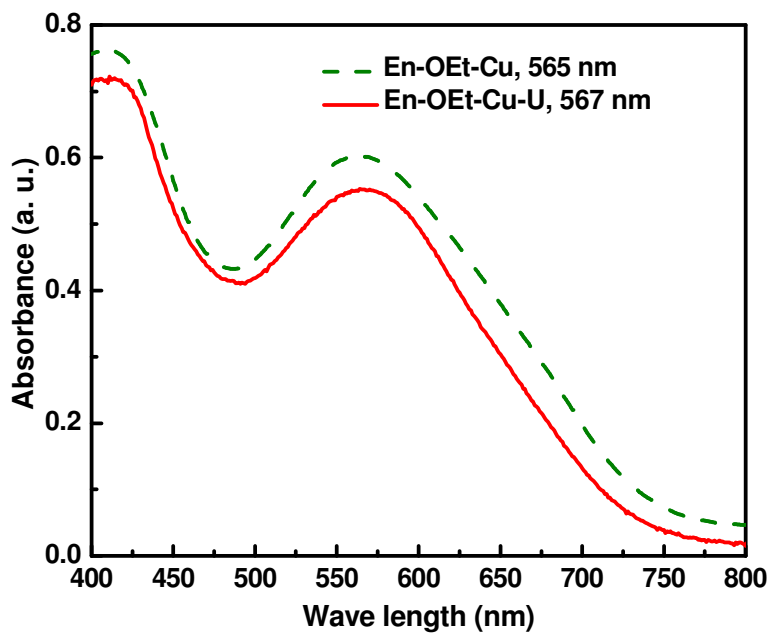

**Fig. S2** Diffuse reflectance spectra, in the range of 400–800 nm, of compound **1** and the corresponding mononuclear copper(II) compound,  $[\text{Cu}^{\text{II}}\text{L}^{\text{OEt-en}}(\text{H}_2\text{O})]$ .

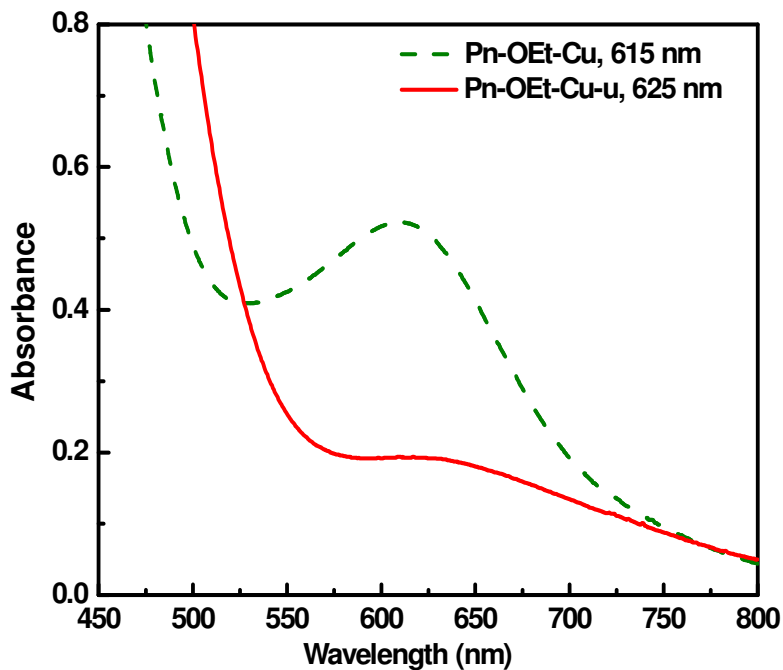

**Fig. S3** Electronic spectra of compound **2** and the corresponding mononuclear copper(II) compound,  $[\text{Cu}^{\text{II}}\text{L}^{\text{OEt-pn}}(\text{H}_2\text{O})]$  in  $2 \times 10^{-3}$  (M) acetonitrile solution in the range of 450–800 nm.

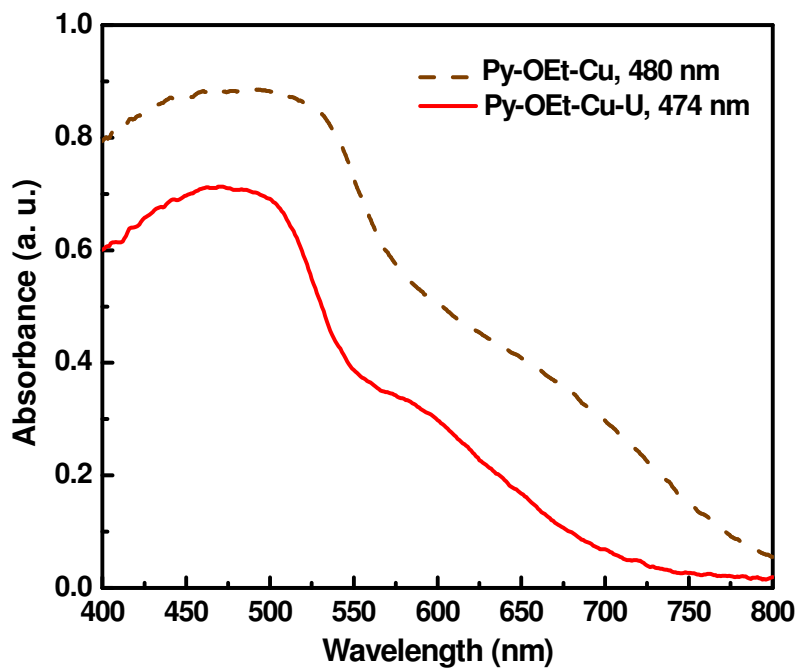

**Fig. S4** Diffuse reflectance spectra, in the range of 400–800 nm, of compound **3** and the corresponding mononuclear copper(II) compound,  $[\text{Cu}^{\text{II}}\text{L}^{\text{OEt-py}}(\text{H}_2\text{O})]$ .

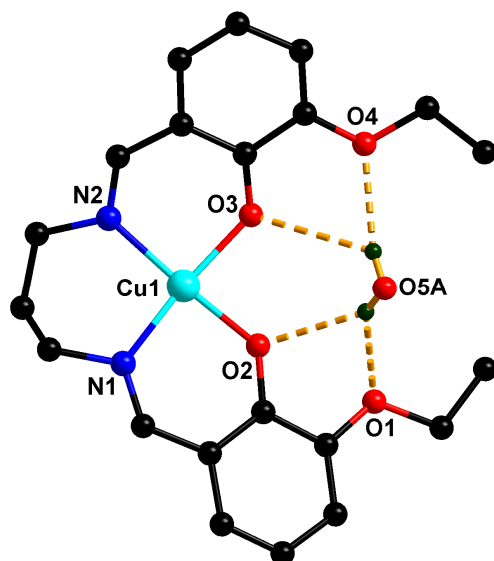

**Fig. S5** Crystal structure of  $[\text{Cu}^{\text{II}}\text{L}^{\text{OEt-pn}}\text{C}(\text{H}_2\text{O})]$ . All the hydrogen atoms except those of encapsulated water are omitted for clarity. Symmetry code: A,  $1 - x, -0.5 + y, 1.5 - z$ .

**Table S2** Crystallographic data for [Cu<sup>II</sup>L<sup>OEt-pn</sup>·(H<sub>2</sub>O)]

|                                                                                                                        | [Cu <sup>II</sup> L <sup>OEt-pn</sup> ·(H <sub>2</sub> O)]           |
|------------------------------------------------------------------------------------------------------------------------|----------------------------------------------------------------------|
| Formula                                                                                                                | C <sub>21</sub> H <sub>26</sub> N <sub>2</sub> O <sub>5</sub> Cu     |
| Fw                                                                                                                     | 449.98                                                               |
| Crystal color                                                                                                          | Green                                                                |
| Crystal system                                                                                                         | Monoclinic                                                           |
| Space group                                                                                                            | <i>P</i> 2 <sub>1</sub> / <i>c</i>                                   |
| <i>a</i> /Å                                                                                                            | 12.4930(17)                                                          |
| <i>b</i> /Å                                                                                                            | 10.3764(14)                                                          |
| <i>c</i> /Å                                                                                                            | 18.9139(18)                                                          |
| <i>α</i> /°                                                                                                            | 90.00                                                                |
| <i>β</i> /°                                                                                                            | 121.136(6)                                                           |
| <i>γ</i> /°                                                                                                            | 90.00                                                                |
| <i>V</i> /Å <sup>3</sup>                                                                                               | 2098.6(4)                                                            |
| <i>Z</i>                                                                                                               | 4                                                                    |
| <i>T</i> /K                                                                                                            | 296(2)                                                               |
| 2 <i>θ</i> /°                                                                                                          | 3.80–50.34                                                           |
| <i>μ</i> /mm <sup>-1</sup>                                                                                             | 1.075                                                                |
| <i>D</i> <sub>calcd</sub> /g cm <sup>-3</sup>                                                                          | 1.424                                                                |
| <i>F</i> (000)                                                                                                         | 940                                                                  |
| absorption-correction                                                                                                  | Multi-scan                                                           |
| index ranges                                                                                                           | – 13 ≤ <i>h</i> ≤ 14<br>– 12 ≤ <i>k</i> ≤ 12<br>– 22 ≤ <i>l</i> ≤ 22 |
| reflections collected                                                                                                  | 14318                                                                |
| independent reflections<br>( <i>R</i> <sub>int</sub> )                                                                 | 3762(0.0617)                                                         |
| <i>R</i> <sub>1</sub> <sup>b</sup> , <i>wR</i> <sub>2</sub> <sup>c</sup> ( <i>I</i> > 2σ( <i>I</i> ))                  | 0.0448/0.0997                                                        |
| <i>R</i> <sub>1</sub> <sup>b</sup> , <i>wR</i> <sub>2</sub> <sup>c</sup> (for all <i>F</i> <sub>o</sub> <sup>2</sup> ) | 0.0729/0.1117                                                        |

$${}^a R_1 = [\sum ||F_o| - |F_c|| / \sum |F_o|]. \quad {}^b wR_2 = [\sum w(F_o^2 - F_c^2)^2 / \sum wF_o^4]^{1/2}.$$



**Table S3** Bond lengths (Å) and bond angles (°) in the coordination environments of the copper(II) in compound [Cu<sup>II</sup>L<sup>OEt-pn</sup>·(H<sub>2</sub>O)]

| Bond lengths |          | Bond angles |            |
|--------------|----------|-------------|------------|
| Cu1–N1       | 1.963(3) | O3–Cu1–N1   | 169.89(11) |
| Cu1–N2       | 1.971(3) | O2–Cu1–N2   | 166.42(11) |
| Cu1–O2       | 1.912(2) | O2–Cu1–N1   | 91.61(11)  |
| Cu1–O3       | 1.918(2) | O2–Cu1–O3   | 84.61(9)   |
|              |          | N2–Cu1–O3   | 91.22(11)  |
|              |          | N1–Cu1–N2   | 94.50(12)  |

**Table S4** The geometries (bond lengths in Å and bond angles in °) of the hydrogen bonds in [Cu<sup>II</sup>L<sup>OEt-pn</sup>·(H<sub>2</sub>O)]. Symmetry code: A, 1 – x, – 0.5 + y, 1.5 – z

| D–H···A       | D···A | H···A | D–H···A |
|---------------|-------|-------|---------|
| O5A–H5AA···O1 | 2.966 | 2.271 | 146.95  |
| O5A–H5AA···O2 | 3.021 | 2.345 | 143.97  |
| O5A–H5BA···O3 | 3.153 | 2.655 | 124.68  |
| O5A–H5BA···O4 | 2.929 | 2.182 | 166.01  |

**Table S5** Bond lengths (Å) and bond angles (°) of the coordination environments in **1**.  
Symmetry code is as in caption of Fig. 1

| Bond lengths |          | Bond angles |            |
|--------------|----------|-------------|------------|
| Cu1–N1       | 1.940(3) | N1–Cu1–O3   | 172.91(14) |
| Cu1–N2       | 1.939(3) | N2–Cu1–O2   | 169.74(14) |
| Cu1–O2       | 1.910(3) | N1–Cu1–O2   | 93.09(13)  |
| Cu1–O3       | 1.916(3) | N2–Cu1–O3   | 93.06(13)  |
|              |          | N1–Cu1–N2   | 84.40(15)  |
|              |          | O2–Cu1–O3   | 90.54(11)  |
|              |          |             |            |
| U1–O5        | 2.527(3) | O5–U1–O5A   | 179.999(1) |
| U1–O7        | 2.501(3) | O7–U1–O7A   | 179.999(1) |
| U1–O8        | 1.757(3) | O8–U1–O8A   | 180.0      |
| U1–O9        | 2.410(3) | O9–U1–O9A   | 180.0      |
|              |          | O5–U1–O7    | 49.98(12)  |
|              |          | O5–U1–O7A   | 130.02(12) |
|              |          | O5–U1–O8    | 93.33(14)  |
|              |          | O5–U1–O8A   | 86.67(14)  |
|              |          | O5–U1–O9    | 66.08(12)  |
|              |          | O5–U1–O9A   | 113.92(12) |
|              |          | O7–U1–O8    | 86.41(15)  |
|              |          | O7–U1–O8A   | 93.59(15)  |
|              |          | O7–U1–O9    | 115.13(12) |
|              |          | O7–U1–O9A   | 64.87(12)  |
|              |          | O8–U1–O9    | 87.56(13)  |
|              |          | O8–U1–O9A   | 92.44(13)  |

**Table S6** Bond lengths (Å) and bond angles (°) of the coordination environments in **2**.  
Symmetry code is as in caption of Fig. 2

| Bond lengths |           | Bond angles |            |
|--------------|-----------|-------------|------------|
| Cu1–N1       | 1.973(4)  | N1A–Cu1–O2  | 166.19(17) |
| Cu1–N2       | 2.392(8)  | O2A–Cu1–O2  | 78.59(19)  |
| Cu1–O2       | 1.968(3)  | O2–Cu1–N1   | 91.29(16)  |
|              |           | N1–Cu1–N1A  | 97.0(3)    |
| Cu1…U1       | 3.3025(8) | N2–Cu1–O2   | 97.62(19)  |
|              |           | N1–Cu1–N2   | 93.0(2)    |
|              |           | Cu1–O2–U1   | 96.69(13)  |
|              |           |             |            |
| U1–O2        | 2.432(3)  | O7–U1–O6    | 174.2(2)   |
| U1–O3        | 2.514(4)  | O2–U1–O5    | 174.13(12) |
| U1–O5        | 2.530(4)  | O3–U1–O3A   | 159.6(2)   |
| U1–O6        | 1.773(6)  | O7–U1–O2    | 98.59(17)  |
| U1–O7        | 1.737(5)  | O6–U1–O2    | 86.34(18)  |
|              |           | O2–U1–O2A   | 61.66(15)  |
|              |           | O3–U1–O7    | 92.55(10)  |
|              |           | O3–U1–O6    | 86.47(10)  |
|              |           | O3–U1–O2A   | 68.53(12)  |
|              |           | O2–U1–O3    | 130.00(12) |
|              |           | O5–U1–O7    | 87.24(19)  |
|              |           | O6–U1–O5    | 87.80(19)  |
|              |           | O2–U1–O5A   | 118.33(13) |
|              |           | O3–U1–O5A   | 110.74(13) |
|              |           | O3–U1–O5    | 49.84(13)  |
|              |           | O5–U1–O5A   | 61.01(18)  |

**Table S7** Bond lengths (Å) and bond angles (°) of the coordination environments in **3**.  
 Symmetry code is as in caption of Fig. 3

| Bond lengths |           | Bond angles |            |
|--------------|-----------|-------------|------------|
| Cu1–N1       | 1.937(5)  | N1–Cu1–O3   | 177.2(2)   |
| Cu1–N3       | 1.947(5)  | N3–Cu1–O2   | 174.57(19) |
| Cu1–O2       | 1.911(4)  | N3–Cu1–O3   | 93.06(19)  |
| Cu1–O3       | 1.916(4)  | N1–Cu1–N3   | 84.2(2)    |
|              |           | N1–Cu1–O2   | 92.60(19)  |
|              |           | O2–Cu1–O3   | 90.16(17)  |
| Cu2–N4       | 1.941(5)  | N6–Cu2–O7   | 177.18(18) |
| Cu2–N6       | 1.956(5)  | N4–Cu2–O8   | 174.7(2)   |
| Cu2–O7       | 1.924(4)  | N4–Cu2–O7   | 92.86(19)  |
| Cu2–O8       | 1.918(4)  | N6–Cu2–N4   | 84.3(2)    |
|              |           | O8–Cu2–O7   | 90.60(16)  |
|              |           | N6–Cu2–O8   | 92.2(2)    |
| U1–O11       | 2.554(5)  | O18–U1–O17  | 176.3(2)   |
| U1–O12       | 2.549(5)  | O12–U1–O19A | 176.41(19) |
| U1–O14       | 2.520(5)  | O19–U1–O15  | 179.23(18) |
| U1–O15       | 2.558(5)  | O14–U1–O11  | 161.24(18) |
| U1–O17       | 1.749(5)  | O18–U1–O19A | 91.2(2)    |
| U1–O18       | 1.746(5)  | O17–U1–O19A | 92.2(2)    |
| U1–O19       | 2.346(4)  | O19–U1–O18  | 89.6(2)    |
| U1–O19A      | 2.334(5)  | O19–U1–O17  | 93.1(2)    |
| U1···U1A     | 3.9453(7) | O19–U1–O19A | 65.1(2)    |
|              |           | O14–U1–O18  | 88.8(2)    |
|              |           | O17–U1–O14  | 91.2(2)    |
|              |           | O14–U1–O19A | 66.05(17)  |
|              |           | O14–U1–O19  | 131.08(18) |
|              |           | O12–U1–O18  | 85.9(2)    |
|              |           | O17–U1–O12  | 90.7(2)    |
|              |           | O12–U1–O19  | 116.95(18) |
|              |           | O12–U1–O14  | 111.69(18) |
|              |           | O18–U1–O11  | 90.4(2)    |
|              |           | O17–U1–O11  | 88.4(2)    |
|              |           | O19–U1–O11A | 132.71(16) |
|              |           | O19–U1–O11  | 67.65(17)  |
|              |           | O12–U1–O11  | 49.57(17)  |
|              |           | O18–U1–O15  | 90.4(2)    |
|              |           | O17–U1–O15  | 86.8(2)    |
|              |           | O19–U1–O15A | 115.66(18) |
|              |           | O14–U1–O15  | 49.70(18)  |
|              |           | O12–U1–O15  | 62.29(19)  |
|              |           | O11–U1–O15  | 111.58(18) |
|              |           | U1–O19–U1A  | 114.9(2)   |

**Table S8** Bond lengths (Å) and bond angles (°) in the coordination environment of **4**. Symmetry code is as in caption of Fig. 4

| CuU unit     |          |             |          | U <sub>2</sub> unit |          |             |          |              |           |             |          |
|--------------|----------|-------------|----------|---------------------|----------|-------------|----------|--------------|-----------|-------------|----------|
| Bond lengths |          | Bond angles |          | Bond lengths        |          | Bond angles |          | Bond lengths |           | Bond angles |          |
| Cu1–N1       | 1.902(9) | N1–Cu1–O3   | 178.3(4) | U1–O1               | 2.655(7) | O5–U1–O6    | 177.1(3) | U2–O10       | 1.726(8)  | O10–U2–O11  | 177.2(4) |
| Cu1–N2       | 1.908(9) | N2–Cu1–O2   | 176.1(4) | U1–O2               | 2.400(7) | O3–U1–O7    | 170.1(3) | U2–O11       | 1.755(8)  | O15–U2–O12A | 177.0(3) |
| Cu1–O3       | 1.906(7) | O6C–Cu1–O18 | 172.84   | U1–O3               | 2.392(7) | O2–U1–O9    | 167.1(3) | U2–O12       | 2.327(8)  | O12–U2–O17  | 176.1(3) |
| Cu1–O2       | 1.912(7) | N1–Cu1–O2   | 96.0(4)  | U1–O4               | 2.625(7) | O4–U1–O1    | 162.4(3) | U2–O17       | 2.527(8)  | O13–U2–O16  | 159.6(4) |
| Cu1–O6C      | 2.625    | N2–Cu1–O3   | 95.7(4)  | U1–O5               | 1.730(7) | O2–U1–O7    | 123.4(3) | U2–O13       | 2.535(8)  | O12A–U2–O11 | 88.7(3)  |
| Cu1–O18      | 2.740    | N1–Cu1–N2   | 86.0(4)  | U1–O6               | 1.755(8) | O2–U1–O4    | 122.4(2) | U2–O16       | 2.498(19) | O11–U2–O17  | 87.4(3)  |
|              |          | O2–Cu1–O3   | 82.3(3)  | U1–O7               | 2.478(7) | O3–U1–O1    | 123.0(2) | U2–O15       | 2.559(8)  | O13–U2–O11  | 86.6(3)  |
|              |          | O6C–Cu1–O3  | 84.78    | U1–O9               | 2.503(8) | O3–U1–O9    | 120.9(3) |              |           | O11–U2–O16  | 93.2(5)  |
|              |          | O6C–Cu1–O2  | 89.71    |                     |          | O9–U1–O1    | 115.9(3) | U2...U2A     | 3.8791(9) | O15–U2–O11  | 89.4(3)  |
|              |          | O6C–Cu1–N1  | 95.4     |                     |          | O7–U1–O4    | 114.1(3) |              |           | O11–U2–O12  | 94.3(3)  |
|              |          | O6C–Cu1–N2  | 93.5     |                     |          | O5–U1–O4    | 100.6(3) |              |           | O10–U2–O12A | 93.3(3)  |
|              |          | O18–Cu1–O3  | 88.06    |                     |          | O6–U1–O3    | 96.8(3)  |              |           | O10–U2–O12  | 88.2(4)  |
|              |          | O18–Cu1–O2  | 89.28    |                     |          | O5–U1–O3    | 86.0(3)  |              |           | O10–U2–O13  | 93.3(3)  |
|              |          | O18–Cu1–N1  | 91.75    |                     |          | O7–U1–O1    | 65.0(3)  |              |           | O10–U2–O16  | 86.0(5)  |
|              |          | O18–Cu1–N2  | 87.24    |                     |          | O6–U1–O1    | 81.8(3)  |              |           | O10–U2–O15  | 88.5(3)  |
|              |          |             |          |                     |          | O5–U1–O1    | 96.9(3)  |              |           | O10–U2–O17  | 90.1(3)  |
| Cu1...U1     | 3.466    | Cu1–O2–U1   | 106.4(3) |                     |          | O6–U1–O4    | 80.6(3)  |              |           | O13–U2–O15  | 48.9(3)  |
|              |          | Cu1–O3–U1   | 107.0(3) |                     |          | O5–U1–O2    | 86.1(3)  |              |           | O13–U2–O17  | 110.3(3) |
|              |          |             |          |                     |          | O6–U1–O2    | 95.4(3)  |              |           | O13–U2–O12  | 66.3(3)  |
|              |          |             |          |                     |          | O3–U1–O2    | 63.2(2)  |              |           | O13–U2–O12A | 133.2(3) |
|              |          |             |          |                     |          | O5–U1–O7    | 87.1(3)  |              |           | O15–U2–O12  | 114.8(3) |
|              |          |             |          |                     |          | O6–U1–O7    | 90.1(3)  |              |           | O15–U2–O17  | 61.6(3)  |
|              |          |             |          |                     |          | O5–U1–O9    | 82.1(3)  |              |           | O15–U2–O16  | 110.6(4) |
|              |          |             |          |                     |          | O6–U1–O9    | 96.1(3)  |              |           | O17–U2–O12A | 116.0(3) |
|              |          |             |          |                     |          | O7–U1–O9    | 50.9(3)  |              |           | O16–U2–O17  | 49.4(4)  |
|              |          |             |          |                     |          | O3–U1–O4    | 60.3(2)  |              |           | O16–U2–O12  | 134.0(4) |
|              |          |             |          |                     |          | O4–U1–O9    | 65.5(3)  |              |           | O16–U2–O12A | 67.2(4)  |
|              |          |             |          |                     |          | O1–U1–O2    | 60.2(2)  |              |           | O12–U2–O12A | 67.6(3)  |
|              |          |             |          |                     |          |             |          |              |           | U2–O12–U2A  | 112.4(3) |

## References

- 1 (a) M. Sakamoto, M. Takagi and T. Ishimori, *J. Coord. Chem.*, 1988, **18**, 201; (b) W. Kanda, M. Nakamura, H. Ōkawa and S. Kida, *Bull. Chem. Soc. Jpn.*, 1982, **55**, 471.
- 2 S. Bhattacharya, A. Jana and S. Mohanta, *Polyhedron*, 2013, **62**, 234.
- 3 S. Bhattacharya, A. Jana, M. Fleck and S. Mohanta, *Inorg. Chim. Acta*, 2013, **405**, 96.
- 4 L. Mandal, S. Bhattacharya and S. Mohanta, *Inorg. Chim. Acta*, 2013, **406**, 87.
- 5 A. Jana and S. Mohanta, *Inorg. Chim. Acta*, 2013, **405**, 265.
- 6 M. Nayak, R. Koner, H.-H. Lin, U. Flörke, H.-H. Wei and S. Mohanta, *Inorg. Chem.*, 2006, **45**, 10764
- 7 Crystal structure of  $[\text{Cu}^{\text{II}}\text{L}^{\text{OEt-pn}}\text{C}(\text{H}_2\text{O})]$  is known: CSD Refcode: WUYGAZ and CCDC No. 739723. However, we have redetermined its single crystal structure.
